# Supplementary material
Source: HighWire-hosted journal article supplement (https://bmjopen.bmj.com/content/12/2/e055403)
Supplement: inline-supplementary-material-1 [file inline-supplementary-material-1.pdf]

# **Educational Status and COVID-19 Related Outcomes in India: Hospital Based Cross Sectional Study**

## **Supplementary Data**

**Supplementary Table 1: Demographic and clinical characteristics of men and women in the study cohort**

| Variables                                                                | Men (n=3386) | Women (N=1259) | P value |
|--------------------------------------------------------------------------|--------------|----------------|---------|
| <b>Age (mean, yr)</b>                                                    | 45.5±17.8    | 47.1±18.5      | 0.226   |
| <b>Age groups</b>                                                        |              |                | 0.008   |
| <30                                                                      | 838[24.7]    | 287[22.8]      |         |
| 30-49                                                                    | 1052[31.1]   | 345[27.4]      |         |
| 50-69                                                                    | 1161[34.3]   | 489[38.8]      |         |
| 70+                                                                      | 335[9.9]     | 138[11.0]      |         |
| <b>Family members/house</b>                                              |              |                | 0.834   |
| 1-4                                                                      | 656[51.7]    | 1739[51.1]     |         |
| 5-9                                                                      | 535[42.1]    | 1465[43.0]     |         |
| ≥10                                                                      | 79[6.2]      | 202[5.9]       |         |
| <b>Educational status *</b>                                              |              |                | <0.001  |
| Illiterate or Primary                                                    | 980[28.8]    | 444[35.0]      |         |
| Secondary school/ Higher secondary                                       | 1061[31.2]   | 477[35.0]      |         |
| Graduate                                                                 | 1339[39.3]   | 328[25.8]      |         |
| <b>Tobacco or smoking (ever)</b>                                         | 1045[30.9]   | 324[25.7]      | 0.001   |
| <b>Medical co-morbidities</b>                                            | 1020[29.9]   | 315[24.8]      | 0.001   |
| Hypertension                                                             | 658[19.3]    | 173[13.6]      | <0.001  |
| Pulmonary disease                                                        | 135[4.0]     | 58[4.6]        | 0.364   |
| Type 2 Diabetes                                                          | 666[19.6]    | 111[8.7]       | <0.001  |
| Thyroid disease                                                          | 27[0.8]      | 11[0.9]        | 0.855   |
| Heart disease                                                            | 51[1.5]      | 24[1.9]        | 0.360   |
| Neurological disease                                                     | 6[0.2]       | 9[0.7]         | 0.008   |
| Current or past tuberculosis                                             | 78[2.3]      | 28[2.3]        | 0.874   |
| Other                                                                    | 55[1.6]      | 57[4.5]        | <0.001  |
| <b>Clinical findings</b>                                                 |              |                |         |
| Pulse rate /min                                                          | 83.91±11.2   | 84.1±11.8      | 0.715   |
| Systolic BP mmHg                                                         | 125.12±11.9  | 126.0±12.9     | 0.028   |
| Diastolic BP mmHg                                                        | 82.71±7.9    | 83.1±8.4       | 0.155   |
| Respiratory rate/min                                                     | 19.0±3.7     | 19.1±3.9       | 0.313   |
| <b>SpO<sub>2</sub> at admission</b>                                      |              |                | 0.601   |
| ≥95%                                                                     | 1554[70.5]   | 590[68.7]      |         |
| 90-94%                                                                   | 397[18.0]    | 164[19.1]      |         |
| <90%                                                                     | 252[11.4]    | 105[12.2]      |         |
| <b>Laboratory Investigations (Biochemistry n=867; Hematology n=4456)</b> |              |                |         |
| Creatinine, mg/dl                                                        | 0.94±0.47    | 0.97±0.56      | 0.378   |
| SGOT, IU                                                                 | 45.0±108.9   | 44.8±44.5      | 0.531   |
| SGPT, IU                                                                 | 42.7±59.7    | 45.6± 44.2     | 0.096   |
| Sodium, mEq/L                                                            | 136.6±9.4    | 134.8±17.8     | 0.144   |
| Potassium, mEq/L                                                         | 5.1±8.9      | 5.9±12.6       | 0.112   |
| Hb (gm/dl)                                                               | 12.7±2.3     | 12.6±2.2       | 0.411   |
| White cells (10 <sup>9</sup> cells/L)                                    | 7585±3894    | 7370±3651      | 0.099   |
| Lymphocytes (10 <sup>9</sup> cells/L)                                    | 1607±1355    | 1534±1225      | 0.089   |
| Lymphocyte/Neutrophil ratio                                              | 0.36±0.27    | 0.35±0.46      | 0.346   |
| <b>Outcome measures</b>                                                  |              |                |         |
| Mean duration of hospital stay[days]                                     | 6.9±3.8      | 6.5±3.6        | 0.004   |
| Oxygen requirement                                                       | 600[17.6]    | 261[20.6]      | 0.022   |

|                                                                                                                                                                                                                         |            |            |        |
|-------------------------------------------------------------------------------------------------------------------------------------------------------------------------------------------------------------------------|------------|------------|--------|
| High flow O <sub>2</sub> /non-invasive ventilation                                                                                                                                                                      | 236[6.9]   | 98[7.7]    | 0.371  |
| Mechanical ventilation                                                                                                                                                                                                  | 123[3.6]   | 46[3.6]    | 1.000  |
| Recovered                                                                                                                                                                                                               | 3020[88.7] | 1197[94.3] | <0.001 |
| Referred                                                                                                                                                                                                                | 104[3.0]   | 15[1.2]    | <0.001 |
| Deaths                                                                                                                                                                                                                  | 282[8.3]   | 58[4.6]    | <0.001 |
| Numbers $\pm$ indicate 1 SD; Numbers in parentheses are percent; BP blood pressure; SpO <sub>2</sub> saturation of peripheral oxygen; SGOT serum glutamic oxalate transferase; SGPT serum glutamic pyruvate transferase |            |            |        |
